# Supplementary material for: Male Lineages in Brazil: Intercontinental Admixture and Stratification of the European Background
Source: PubMed Central journal article supplement (PMC4821637; doi:10.1371/journal.pone.0152573), 2016-04-05
Supplement: pone.0152573.s001.pdf [file pone.0152573.s001.pdf]

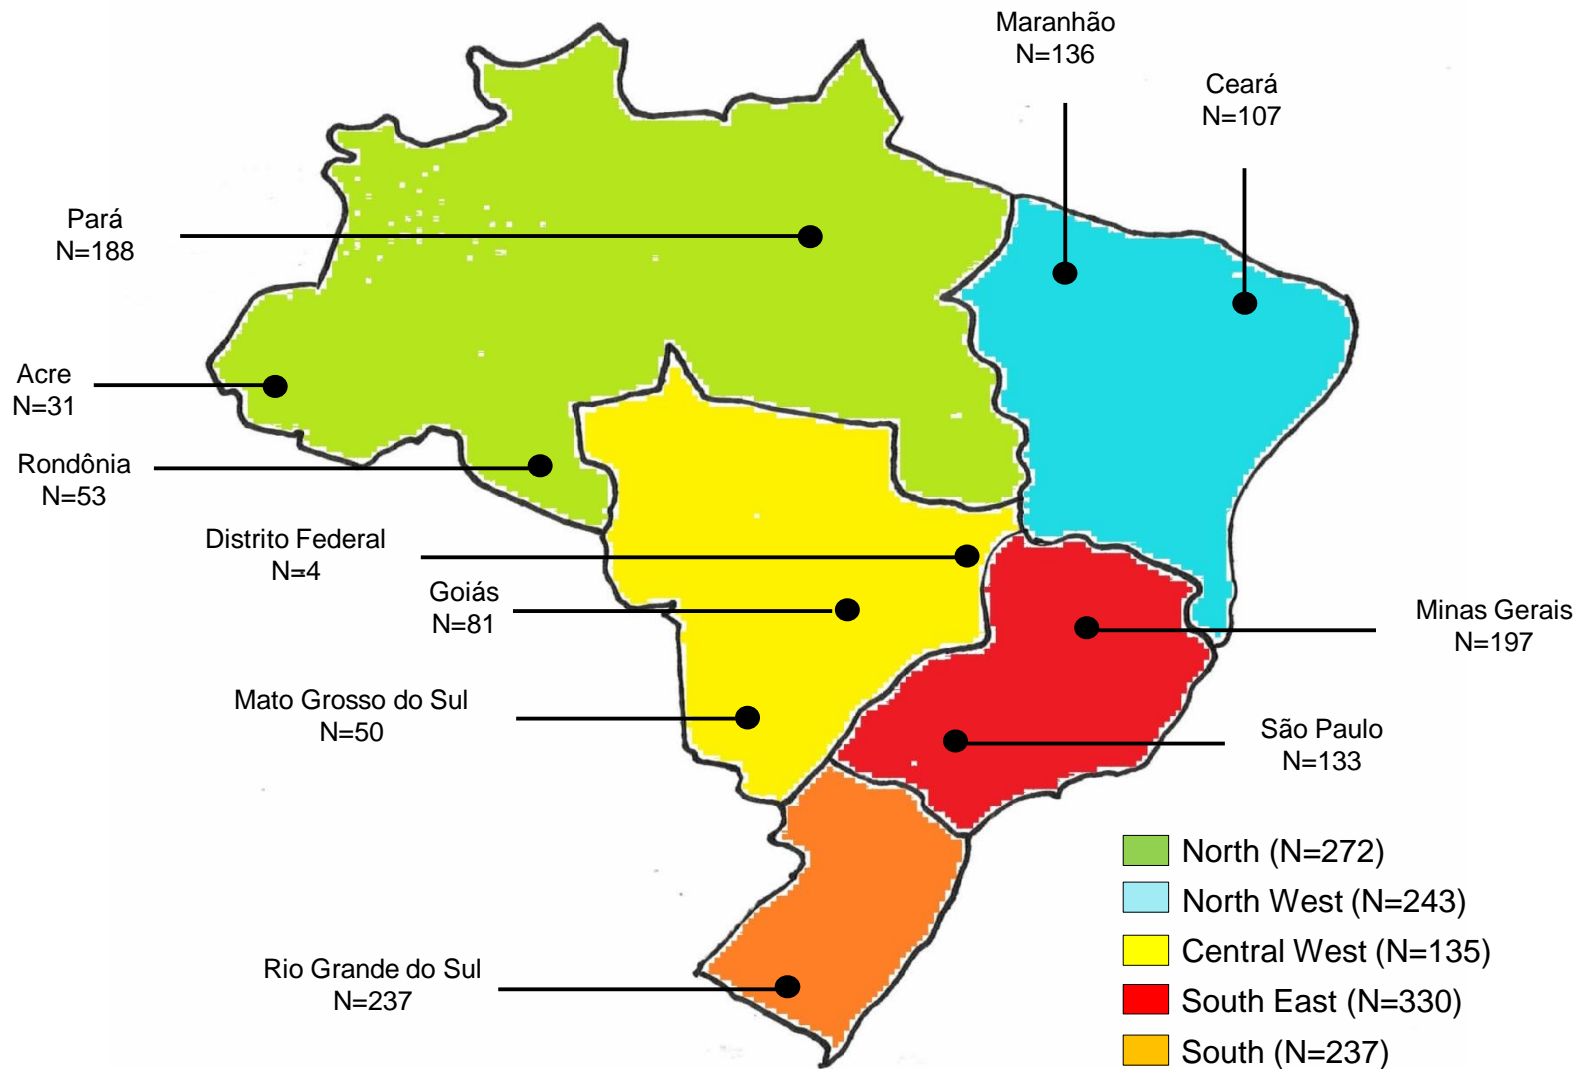

**S1 Fig. Representation of Brazil subdivided into five geopolitical regions, indicating sampling locations and sizes, for the 1217 samples included in this study.**
