# Supplementary material for: Male Lineages in Brazil: Intercontinental Admixture and Stratification of the European Background
Source: PubMed Central journal article supplement (PMC4821637; doi:10.1371/journal.pone.0152573), 2016-04-05
Supplement: pone.0152573.s002.pdf [file pone.0152573.s002.pdf]

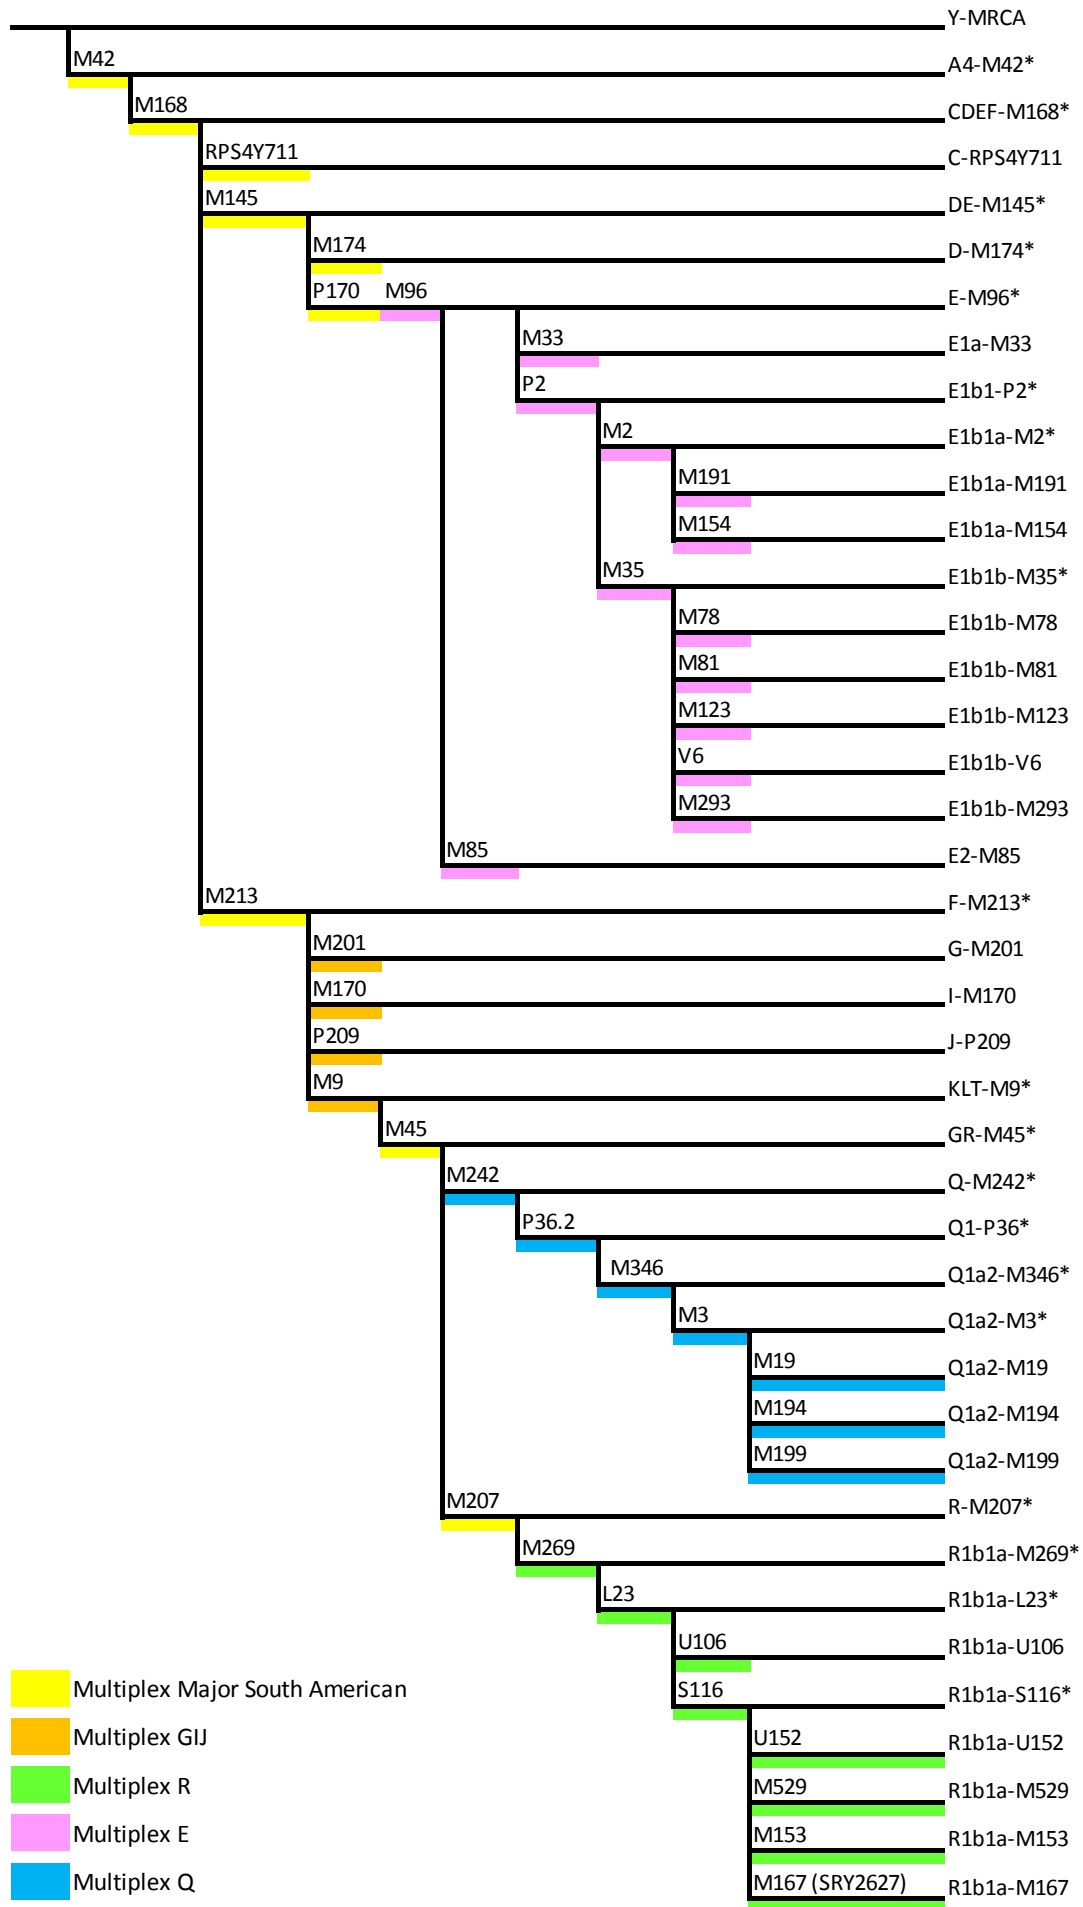

**S2 Fig. Phylogenetic tree of Y-haplogroups analyzed in the present study. The haplogroups are named in accordance with Van Oven et al.<sup>20</sup>**
