# Supplementary material for: Male Lineages in Brazil: Intercontinental Admixture and Stratification of the European Background
Source: PubMed Central journal article supplement (PMC4821637; doi:10.1371/journal.pone.0152573), 2016-04-05
Supplement: pone.0152573.s003.pdf [file pone.0152573.s003.pdf]

**S1 Table.** PCR and Single Base Extension (SBE) primer sequences and reaction condition for Multiplex R.

| <b>PCR*</b>       |            |                                    |                                           |                               |
|-------------------|------------|------------------------------------|-------------------------------------------|-------------------------------|
| <i>Marker</i>     | <i>SNP</i> | <i>PCR Forward Primer (5'-3')</i>  | <i>PCR Reverse Primer (5'-3')</i>         | <i>PCR fragment size (bp)</i> |
| M269              | T>C        | CATGCCTAGCCTCATTCTC                | CTGGATGGTCACGATCTCCT                      | 249                           |
| L23               | G>A        | ACACAGTGAAACCCCGTCTC               | AAGATTGTGGGGACAAAGGA                      | 229                           |
| U106              | C>T        | TCCTGAATAGCAAATCCCAAAG             | AATGGCAGAGGTAGGAGGAAAT                    | 192                           |
| U152              | G>A        | GAAACATTCCACGCTTGAGG               | AGCCTCTTTTTGGCTTCCAT                      | 163                           |
| S116              | C>A        | TCAGTCAGGGCAAATCTGAA               | GGTGGAGTTGGGGCTAAAGT                      | 241                           |
| M529              | C>G        | GCCCCAAAACAACAGAATA                | GGAAGCATTGAGAAGCAGGT                      | 228                           |
| M153              | T>A        | TTCTCAGACACCAATGGTCCTA             | TCTGACTTGGAAGGGGAAA                       | 76                            |
| M167              | C>T        | GAGGCTGGGCCAAGTTAAG                | CTTCCTCGGAACCACTACCA                      | 131                           |
| M207              | A>G        | CGTTACAACACTATGGGGCAA              | TCCTCTCTGAAATGCCGAAT                      | 322                           |
| <b>SNaPshot**</b> |            |                                    |                                           |                               |
| <i>Y-SNP</i>      | <i>***</i> | <i>SBE Primer (5'-3')</i>          | <i>Concentration in the reaction (μM)</i> | <i>SBE fragment size (bp)</i> |
| M269              | <i>For</i> | GTCTGACAAGGAATGATCAGGGTTTGGTTAAT   | 0.12                                      | 32                            |
| L23               | <i>For</i> | GCGACAGAGCGAGACTCT                 | 0.16                                      | 18                            |
| U106              | <i>Rev</i> | TCTGACAATAGCAAATCCCAAAGCTCCA       | 0.12                                      | 28                            |
| U152              | <i>Rev</i> | CAAGGATAAGAAAAATGAGTATTGTGAAAATA   | 0.08                                      | 32                            |
| S116              | <i>Rev</i> | GAAAGTCTGACAAGAGTTGGGGCTAAAGTAAAAG | 0.04                                      | 35                            |
| M529              | <i>For</i> | AATAACAACCGCTCTCTCAGACA            | 0.04                                      | 23                            |
| M153              | <i>Rev</i> | AAAGCTCAAAGGGTATGTGAACA            | 0.04                                      | 23                            |
| M167 (SRY2627)    | <i>For</i> | AAGCCCCACAGGGTGC                   | 0.04                                      | 16                            |
| M207              | <i>For</i> | AACAAATGTAAGTCAAGCAAGAAATTTA       | 0.10                                      | 28                            |

\*PCR was carried out in 10 μl containing: 5μl Qiagen® multiplex PCR kit, 0.2μM of each primer and 5-10 ng DNA. Thermocycling conditions: denaturation at 95°C for 15 min; 35 cycles at 94°C for 30s, 60°C for 90s and 72°C for 60s; final extension of 72°C, 10 min. Prior to SNaPshot reaction, 1 μl of the PCR product was purified with 0.5 μl of Exo-SAP-it (USB), incubated at 37°C for 15 min, and followed by an enzyme inactivation at 85°C for 15 min. \*\*SNaPshot was carried out in 5 μl reaction containing 1 μl of SNaPshot™ Multiplex Ready Mix (Applied Biosystems), 1.5 μl of purified PCR product and extension primers. The reactions were submitted to 25 cycles of 96°C for 10 s, 50°C for 5 s and 60°C for 30 s. Final products were purified with 1 μl of SAP (USB) at 37°C for 1 h, followed by a denaturing step of 85°C for 15 min. The single-base extension products were run on an ABI 3130 Genetic Analyzer (Applied Biosystems), and the analysis was performed with GeneMapper® Software v4.0. \*\*\*Annealing of the SBE primers in forward or reverse sequence direction.
