# Supplementary material for: Male Lineages in Brazil: Intercontinental Admixture and Stratification of the European Background
Source: PubMed Central journal article supplement (PMC4821637; doi:10.1371/journal.pone.0152573), 2016-04-05
Supplement: pone.0152573.s004.pdf [file pone.0152573.s004.pdf]

**S2 Table.** Matrix showing the pairwise  $F_{ST}$ s (below diagonal) among the 5 regions of Brazil, Portugal [41], Iberia [42], France [44], Italy [43], Germany [45], Lebanon [46], Angola [48], Equatorial Guinea [47] and Native Americans from Colombia [40], Brazil [39], and Argentina [38]; and the corresponding differentiation  $p$  values (above diagonal) obtained for 50,175 permutations (s.e. $\leq$ 0.0022). Significant non-differentiation  $p$ -values are indicated in red; for a significance level of 0.00042, obtained by applying the Bonferroni correction for multiple tests.

|                   | Brazil_N | Brazil_NE | Brazil_CW | Brazil_SE | Brazil_S | Portugal | Iberia | France  | Italy   | Germany | Lebanon | Angola | Equatorial Guinea | NAM_Colombia | NAM_Brazil | NAM_Argentina |
|-------------------|----------|-----------|-----------|-----------|----------|----------|--------|---------|---------|---------|---------|--------|-------------------|--------------|------------|---------------|
| Brazil_N          | *        | 0.0354    | 0.0731    | 0.0732    | 0.0650   | 0.0003   | <5E-6  | 0.0003  | <5E-6   | <5E-6   | <5E-6   | <5E-6  | <5E-6             | <5E-6        | <5E-6      | <5E-6         |
| Brazil_NE         | 0.0057   | *         | 0.0054    | 0.0980    | 0.0026   | <5E-6    | <5E-6  | <5E-6   | 0.00002 | <5E-6   | <5E-6   | <5E-6  | <5E-6             | <5E-6        | <5E-6      | <5E-6         |
| Brazil_CW         | 0.0056   | 0.0158    | *         | 0.0635    | 0.1549   | 0.1052   | 0.0045 | 0.0089  | 0.0001  | <5E-6   | <5E-6   | <5E-6  | <5E-6             | <5E-6        | <5E-6      | <5E-6         |
| Brazil_SE         | 0.0034   | 0.0030    | 0.0058    | *         | 0.0718   | 0.0002   | <5E-6  | 0.00002 | <5E-6   | <5E-6   | <5E-6   | <5E-6  | <5E-6             | <5E-6        | <5E-6      | <5E-6         |
| Brazil_S          | 0.0042   | 0.0134    | 0.0031    | 0.0037    | *        | 0.2013   | 0.0028 | 0.0126  | <5E-6   | <5E-6   | <5E-6   | <5E-6  | <5E-6             | <5E-6        | <5E-6      | <5E-6         |
| Portugal          | 0.0136   | 0.0290    | 0.0037    | 0.0134    | 0.0011   | *        | 0.0167 | 0.0002  | <5E-6   | <5E-6   | <5E-6   | <5E-6  | <5E-6             | <5E-6        | <5E-6      | <5E-6         |
| Iberia            | 0.0288   | 0.0519    | 0.0137    | 0.0268    | 0.0091   | 0.0027   | *      | <5E-6   | <5E-6   | <5E-6   | <5E-6   | <5E-6  | <5E-6             | <5E-6        | <5E-6      | <5E-6         |
| France            | 0.0138   | 0.0251    | 0.0128    | 0.0183    | 0.0071   | 0.0088   | 0.0178 | *       | <5E-6   | <5E-6   | <5E-6   | <5E-6  | <5E-6             | <5E-6        | <5E-6      | <5E-6         |
| Italy             | 0.0227   | 0.0158    | 0.0237    | 0.0279    | 0.0274   | 0.0404   | 0.0677 | 0.0358  | *       | <5E-6   | <5E-6   | <5E-6  | <5E-6             | <5E-6        | <5E-6      | <5E-6         |
| Germany           | 0.0655   | 0.0595    | 0.0797    | 0.0710    | 0.0668   | 0.0873   | 0.1196 | 0.0639  | 0.0500  | *       | <5E-6   | <5E-6  | <5E-6             | <5E-6        | <5E-6      | <5E-6         |
| Lebanon           | 0.1864   | 0.1636    | 0.1800    | 0.1932    | 0.2111   | 0.2305   | 0.2791 | 0.2280  | 0.1090  | 0.1863  | *       | <5E-6  | <5E-6             | <5E-6        | <5E-6      | <5E-6         |
| Angola            | 0.3527   | 0.2996    | 0.4126    | 0.3334    | 0.3958   | 0.4226   | 0.4631 | 0.4159  | 0.3289  | 0.3616  | 0.3691  | *      | 0.0887            | <5E-6        | <5E-6      | <5E-6         |
| Equatorial Guinea | 0.3088   | 0.2551    | 0.3610    | 0.2901    | 0.3478   | 0.3807   | 0.4238 | 0.3746  | 0.2851  | 0.3089  | 0.3266  | 0.0121 | *                 | <5E-6        | <5E-6      | <5E-6         |
| NAM_Colombia      | 0.2475   | 0.2586    | 0.3096    | 0.2838    | 0.3060   | 0.3389   | 0.3855 | 0.3325  | 0.2443  | 0.2778  | 0.2887  | 0.4903 | 0.4285            | *            | 0.0862     | 0.0524        |
| NAM_Brazil        | 0.2287   | 0.2435    | 0.2946    | 0.2658    | 0.2911   | 0.3228   | 0.3674 | 0.3179  | 0.2389  | 0.2725  | 0.2969  | 0.4979 | 0.4258            | 0.0180       | *          | 0.6035        |
| NAM_Argentina     | 0.2578   | 0.2773    | 0.3248    | 0.2975    | 0.3192   | 0.3466   | 0.3902 | 0.3429  | 0.2617  | 0.2974  | 0.3148  | 0.5565 | 0.4814            | 0.0242       | -0.0082    | *             |
