# Supplementary material for: Male Lineages in Brazil: Intercontinental Admixture and Stratification of the European Background
Source: PubMed Central journal article supplement (PMC4821637; doi:10.1371/journal.pone.0152573), 2016-04-05
Supplement: pone.0152573.s005.pdf [file pone.0152573.s005.pdf]

**S3 Table.** Frequency distribution of R1b1b-M269 sub-haplogroups with respect to total of samples from haplogroup R1b1b-M269 in the five geopolitical region of Brazil and in the other population samples used for comparison.

| Haplogroup  | North<br>(n=97) | North East<br>(n=41) | Central West<br>(n=50) | South East<br>(n=104) | South<br>(n=77) | Spain<br>(n=111) | Portugal<br>(n=182) | Netherlands<br>(n=46) | France<br>(n=53) | Germany<br>(n=141) | Italy<br>(n=105) | Turkey<br>(n=91) |
|-------------|-----------------|----------------------|------------------------|-----------------------|-----------------|------------------|---------------------|-----------------------|------------------|--------------------|------------------|------------------|
| R1b1a-M269* | 0.0000          | 0.0000               | 0.0000                 | 0.0000                | 0.0000          | 0.0000           | 0.0000              | 0.0000                | 0.0000           | 0.0213             | 0.0286           | 0.1319           |
| R1b1a-L23*  | 0.0206          | 0.0732               | 0.1200                 | 0.0096                | 0.0260          | 0.0270           | 0.1593              | 0.0000                | 0.0566           | 0.0638             | 0.1905           | 0.7912           |
| R1b1a-U106  | 0.0619          | 0.0490               | 0.0600                 | 0.0769                | 0.1688          | 0.0450           | 0.0659              | 0.6957                | 0.1321           | 0.4752             | 0.0952           | 0.0220           |
| R1b1a-S116* | 0.6907          | 0.7070               | 0.6000                 | 0.6538                | 0.5974          | 0.7928           | 0.5824              | 0.1304                | 0.3962           | 0.1560             | 0.1333           | 0.0220           |
| R1b1a-U152  | 0.1134          | 0.0980               | 0.1000                 | 0.1154                | 0.1299          | 0.0541           | 0.1099              | 0.0652                | 0.2642           | 0.2340             | 0.5429           | 0.0330           |
| R1b1a-M529  | 0.0928          | 0.0490               | 0.1200                 | 0.1058                | 0.0519          | 0.0811           | 0.0824              | 0.1087                | 0.1509           | 0.0496             | 0.0095           | 0.0000           |
| R1b1a-M153  | 0.0000          | 0.0000               | 0.0000                 | 0.0096                | 0.0000          | n.d.             | n.d.                | n.d.                  | n.d.             | n.d.               | n.d.             | n.d.             |
| R1b1a-M167  | 0.0206          | 0.0240               | 0.0000                 | 0.0288                | 0.0260          | n.d.             | n.d.                | n.d.                  | n.d.             | n.d.               | n.d.             | n.d.             |

**Note:** The Y-SNPs M153 and M167 were only investigated in the Brazilian samples from this work and, therefore, this sub-haplogroups were pooled with R1b1a-S116\* in comparisons with other populations. Not determined: n.d.
