# Supplementary material for: Male Lineages in Brazil: Intercontinental Admixture and Stratification of the European Background
Source: PubMed Central journal article supplement (PMC4821637; doi:10.1371/journal.pone.0152573), 2016-04-05
Supplement: pone.0152573.s006.pdf [file pone.0152573.s006.pdf]

**S4 Table.** Matrix of the pairwise  $F_{ST}$  genetic distances among the 5 geopolitical regions of Brazil and seven European populations (below diagonal) and the corresponding differentiation  $p$  values (above diagonal) obtained for 10,100 permutations (s.e. $\leq$ 0.0038).  $F_{ST}$  values were calculated based of the frequencies of R1b1a-L23\*, R1b1a-U106, R1b1a-S116\*, R1b1a-U152 and R1b1a-M529 haplogroups that are indicated in S3 Table.

|                     | Brazil_North | Brazil_North East | Brazil_Central West | Brazil_South East | Brazil_South | Spain   | Portugal | Netherlands | France         | Germany | Italy   | Turkey  |
|---------------------|--------------|-------------------|---------------------|-------------------|--------------|---------|----------|-------------|----------------|---------|---------|---------|
| Brazil_North        | *            | 0.8303            | 0.20606             | 0.97393           | 0.15003      | 0.24672 | 0.01139  | < 5E-06     | <b>0.00020</b> | < 5E-06 | < 5E-06 | < 5E-06 |
| Brazil_North East   | -0.01218     | *                 | 0.43500             | 0.63023           | 0.22654      | 0.49024 | 0.17105  | < 5E-06     | 0.00190        | < 5E-06 | < 5E-06 | < 5E-06 |
| Brazil_Central West | 0.00713      | -0.00175          | *                   | 0.23683           | 0.23068      | 0.01403 | 0.90930  | < 5E-06     | 0.02947        | < 5E-06 | < 5E-06 | < 5E-06 |
| Brazil_South East   | -0.00913     | -0.0077           | 0.00531             | *                 | 0.23323      | 0.11332 | 0.00969  | < 5E-06     | <b>0.00055</b> | < 5E-06 | < 5E-06 | < 5E-06 |
| Brazil_South        | 0.00877      | 0.00691           | 0.00631             | 0.00441           | *            | 0.00425 | 0.03995  | < 5E-06     | 0.01154        | < 5E-06 | < 5E-06 | < 5E-06 |
| Spain               | 0.00315      | -0.00418          | 0.04040             | 0.00911           | 0.04360      | *       | < 5E-06  | < 5E-06     | < 5E-06        | < 5E-06 | < 5E-06 | < 5E-06 |
| Portugal            | 0.02333      | 0.00916           | -0.01008            | 0.02269           | 0.01654      | 0.05264 | *        | < 5E-06     | 0.00300        | < 5E-06 | < 5E-06 | < 5E-06 |
| Netherlands         | 0.43101      | 0.44098           | 0.35764             | 0.40938           | 0.32000      | 0.51517 | 0.34132  | *           | < 5E-06        | < 5E-06 | < 5E-06 | < 5E-06 |
| France              | 0.09193      | 0.09091           | 0.03707             | 0.08001           | 0.04566      | 0.17183 | 0.04619  | 0.24495     | *              | < 5E-06 | < 5E-06 | < 5E-06 |
| Germany             | 0.28764      | 0.28079           | 0.21957             | 0.27266           | 0.19359      | 0.36031 | 0.22041  | 0.04955     | 0.10664        | *       | < 5E-06 | < 5E-06 |
| Italy               | 0.32587      | 0.31248           | 0.24590             | 0.31570           | 0.25998      | 0.41119 | 0.23609  | 0.33912     | 0.10977        | 0.15480 | *       | < 5E-06 |
| Turkey              | 0.56708      | 0.56575           | 0.47485             | 0.55816           | 0.52020      | 0.62374 | 0.40992  | 0.57869     | 0.43540        | 0.41496 | 0.38356 | *       |

**Note:** in bold are indicated the  $p$ -values that are below the significance value 0.00076, obtained after applying Bonferroni's correction for multiple tests.
